# Supplementary material
Source: PubMed Central journal article supplement (PMC2894638)
Supplement: NIHMS128546-supplement-Appendix_1.pdf [file NIHMS128546-supplement-Appendix_1.pdf]

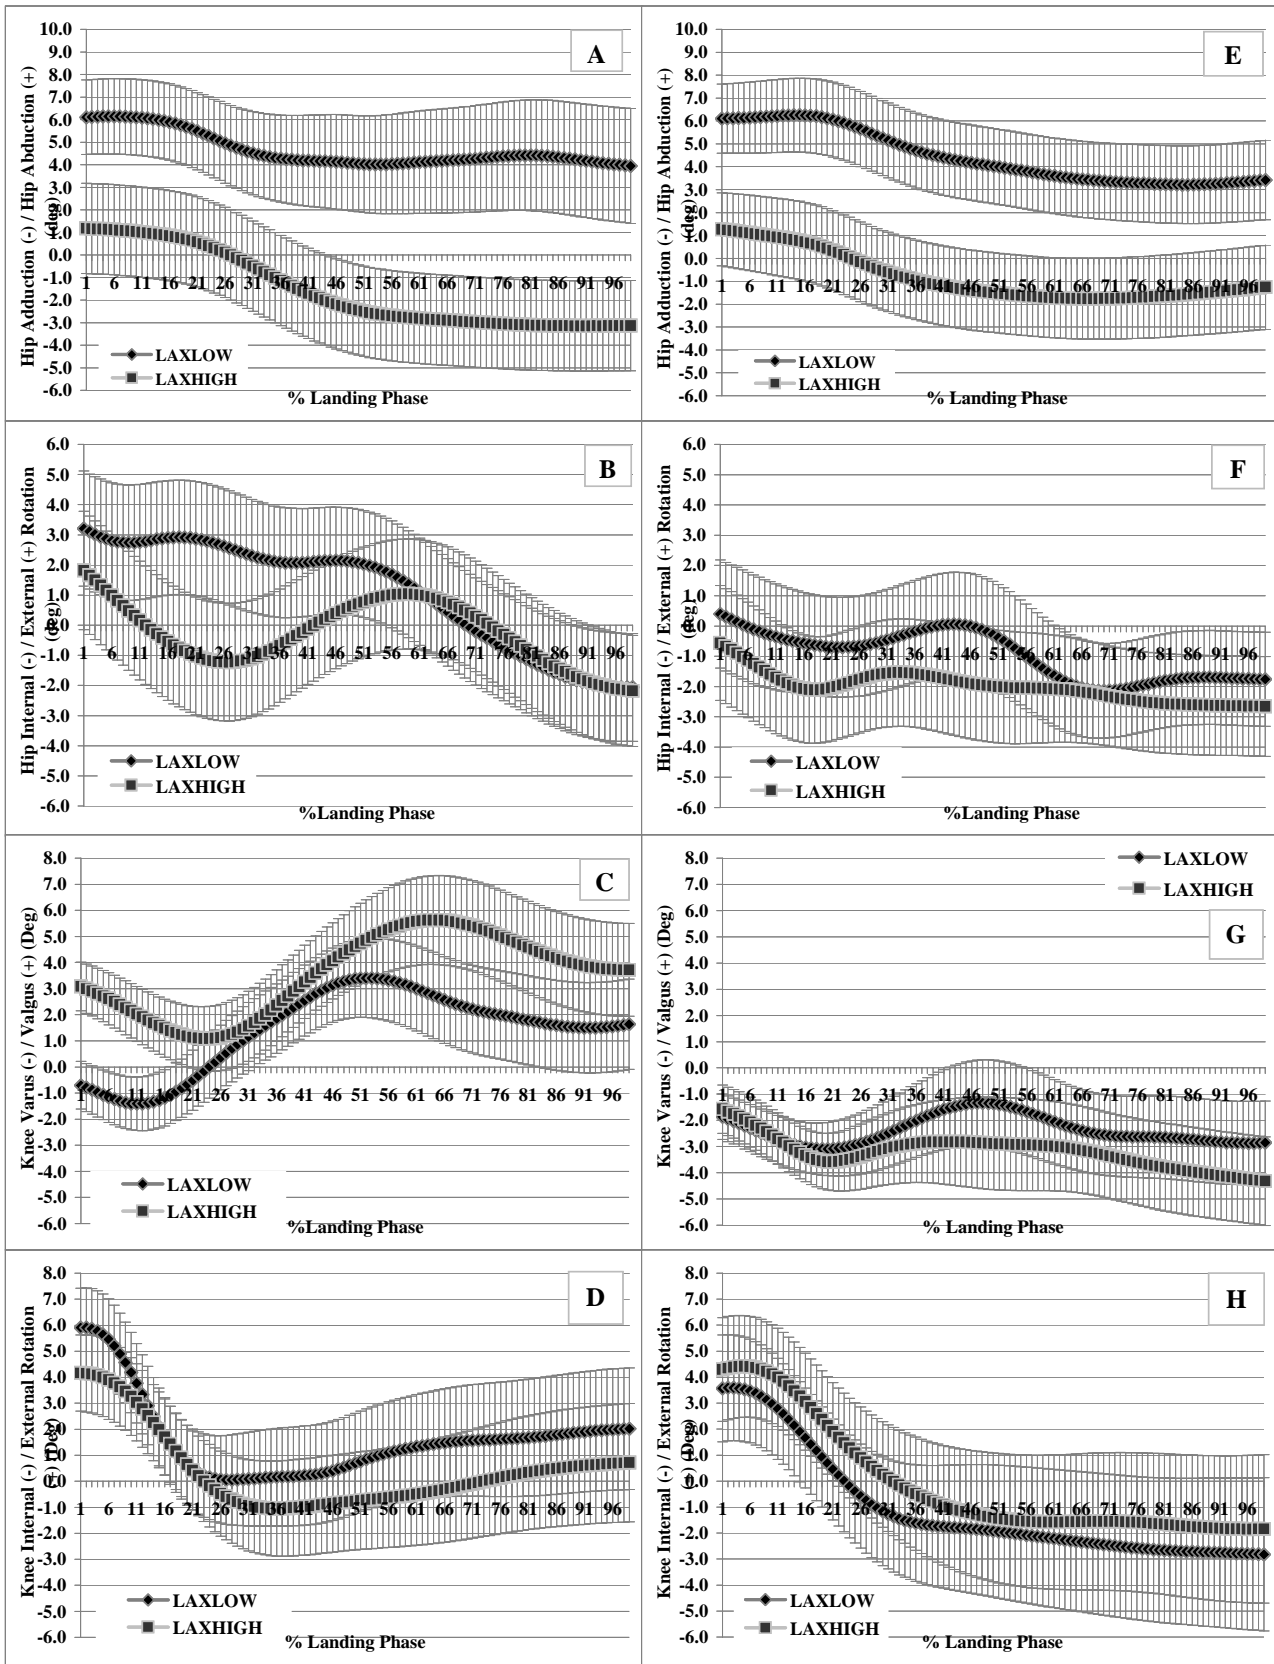

Appendix 1 A-H. Comparison of LAXHIGH and LAXLOW Females (A-D) and Males (E-H) on Hip and Knee Joint Kinematic Patterns Across the Landing Phase of a Drop Jump.
